# Supplementary material
Source: PubMed Central journal article supplement (PMC1380199)
Supplement: jamia_M1861_1.pdf [file jamia_M1861_1.pdf]

| <b>Variable</b>        | <b>Number of Users</b> | <b>Median use Per month</b> | <b>p-value</b> |
|------------------------|------------------------|-----------------------------|----------------|
| <b>Target Resource</b> |                        |                             |                |
| SkolarMD               | 142                    | 0.42                        |                |
| Micromedex             | 224                    | 0.56                        | 0.01           |
| <b>User Type</b>       |                        |                             |                |
| Primary Care Physician | 158                    | 0.50                        |                |
| Specialist Physician   | 23                     | 0.46                        | 0.75           |
| Nurse practitioner     | 61                     | 0.75                        | 0.19           |
| Other                  | 111                    | 0.42                        | 0.10           |
| <b>User Gender</b>     |                        |                             |                |
| Male                   | 79                     | 0.50                        |                |
| Female                 | 287                    | 0.50                        | 0.92           |

**Table 2. Median KnowledgeLink usage per month by target resource, type of provider, and provider gender. There was insufficient data to determine the role of 13 users.**

| <b>Assertion</b>                                              | <b>Overall</b><br>(n=59) | <b>MDX</b><br>(n=44) | <b>SkolarMD</b><br>(n=15) | <b>p-value</b> |
|---------------------------------------------------------------|--------------------------|----------------------|---------------------------|----------------|
| KL was easy to use.                                           | 86%                      | 93%                  | 67%                       | 0.05           |
| KL was fast.                                                  | 90%                      | 95%                  | 73%                       | 0.06           |
| KL took me to the relevant resource.                          | 83%                      | 95%                  | 47%                       | 0.001          |
| KL interrupted the workflow.                                  | 15%                      | 11%                  | 27%                       | 0.18           |
| KL improved patient care.                                     | 80%                      | 89%                  | 53%                       | 0.02           |
| KL should be extended to problems and diseases.               | 79%                      | 84%                  | 64%                       | 0.07           |
| KL should be extended to lab results and reports.             | 67%                      | 68%                  | 64%                       | 0.70           |
| I would like to be able to specify more precise KL queries.   | 65%                      | 64%                  | 71%                       | 0.49           |
| I would like to be able to specify to which resource KL goes. | 58%                      | 51%                  | 79%                       | 0.08           |

**Table 5a. User impressions about KnowledgeLink. Reported are percentages agreeing or strongly agreeing with the given assertions (5 point Likert scale). Measures of significance are from logistic regression models which included familiarity of KnowledgeLink as measured by frequency of use.**

| <b>Assertion</b>                                               | <b>Overall<br/>(n=43)</b> | <b>MDX<br/>(n=30)</b> | <b>SkolarMD<br/>(n=13)</b> | <b>p-value</b> |
|----------------------------------------------------------------|---------------------------|-----------------------|----------------------------|----------------|
| Overall I was satisfied with MDX/SkolarMD                      | 77%                       | 87%                   | 54%                        | 0.05           |
| I was able to find answers to my questions.                    | 80%                       | 90%                   | 55%                        | 0.02           |
| MDX/SkolarMD was easy and intuitive to navigate.               | 74%                       | 87%                   | 46%                        | 0.02           |
| I was able to find answers in a timely manner.                 | 72%                       | 83%                   | 46%                        | 0.04           |
| MDX/SkolarMD provided an adequate selection of useful content. | 71%                       | 83%                   | 42%                        | 0.03           |
| MDX/SkolarMD provided an adequate level of content detail.     | 71%                       | 83%                   | 36%                        | <0.01          |
| I would recommend MDX/SkolarMD to a colleague.                 | 78%                       | 90%                   | 50%                        | 0.02           |

**Table 5b. User impressions about the target resource. Reported are percentages agreeing or strongly agreeing with the given assertions (5 point Likert scale). Measures of significance are from logistic regression models which included familiarity of KnowledgeLink as measured by frequency of use.**

| <b>SkolarMD Resource</b>                                           | <b>Number of sessions in which used</b> | <b>Median time spent per page (seconds)</b> |
|--------------------------------------------------------------------|-----------------------------------------|---------------------------------------------|
| A to Z Drug Facts (available middle of and late 2003 only)         | 139                                     | 81                                          |
| Drug Facts and Comparisons                                         | 120                                     | 10                                          |
| Lexi-Comp's Clinical Reference Library (available early 2003 only) | 25                                      | 127                                         |
| The Medical Letter                                                 | 15                                      | 45                                          |
| Melmon and Morrelli's Clinical Pharmacology                        | 8                                       | 15                                          |
| PubMed Practice Guidelines (Citations Only)                        | 4                                       | 10                                          |
| MEDLINE                                                            | 4                                       | 32                                          |
| PubMed Practice Guideline Citations                                | 4                                       | 10                                          |
| Cochrane Database of Systematic Reviews                            | 3                                       | 18                                          |
| Oxford Textbook of Medicine (Warrell)                              | 3                                       | 25                                          |
| Patient Handouts (CDC, FDA, NIH, NWHIC)                            | 3                                       | 31                                          |
| Harrison's Principles of Internal Medicine (Braunwald)             | 3                                       | 17                                          |
| FDA MedWatch                                                       | 2                                       | 33                                          |
| Griffith's 5 Minute Clinical Consult (Dambro)                      | 2                                       | 21                                          |
| Oski's Pediatrics: Principles and Practice (McMillan)              | 1                                       | 5                                           |
| Natural Medicines Comprehensive Database                           | 1                                       | 64                                          |
| Links to American Academy of Family Physicians website             | 1                                       | 33                                          |

**Table 6: Reference resources in SkolarMD accessed during 287 KnowledgeLink sessions. (Reflects resources available on SkolarMD in 2003.)**

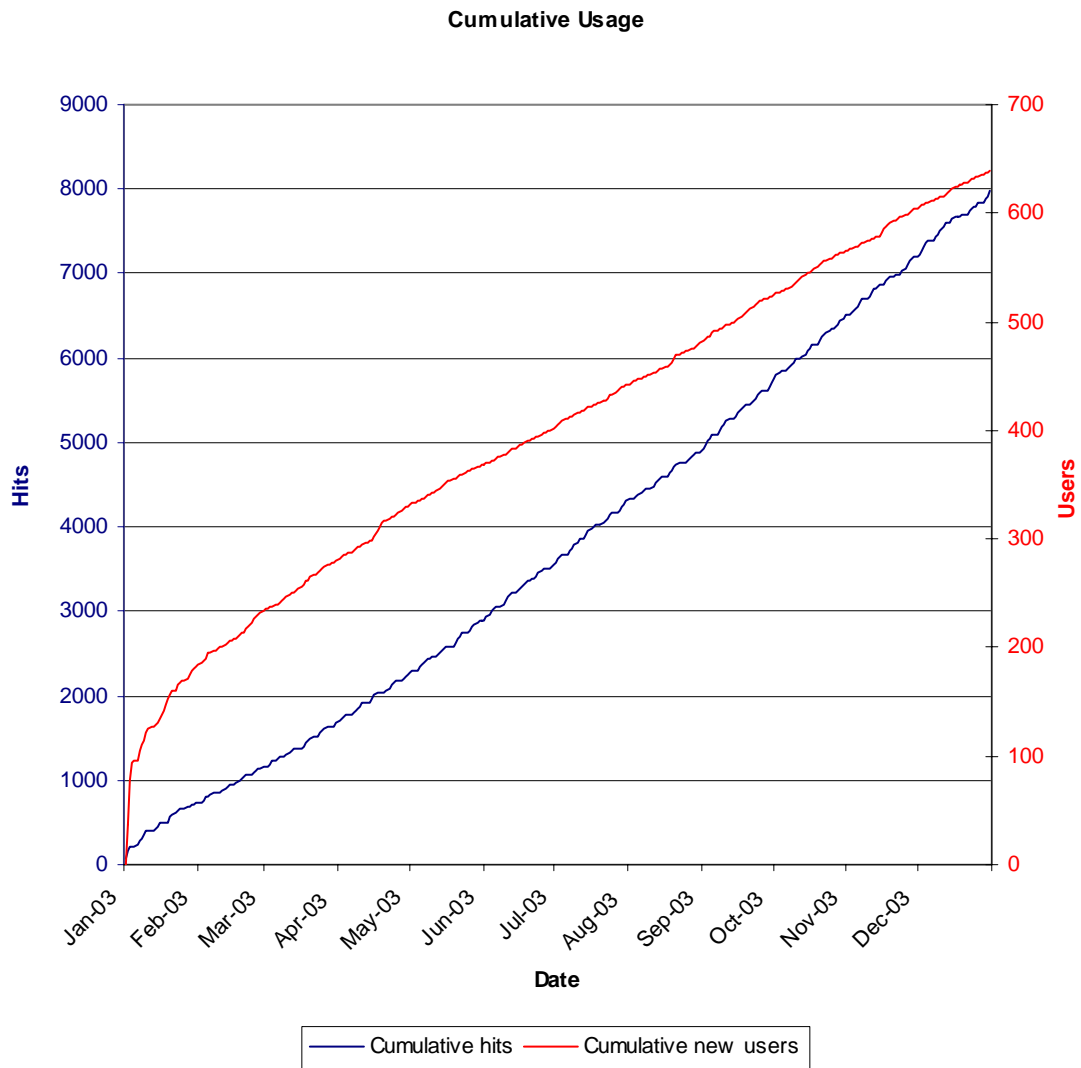

**Figure 2. KnowledgeLink Usage (cumulative hits and new users) as a function of time.**

KL Usage by Time of Day

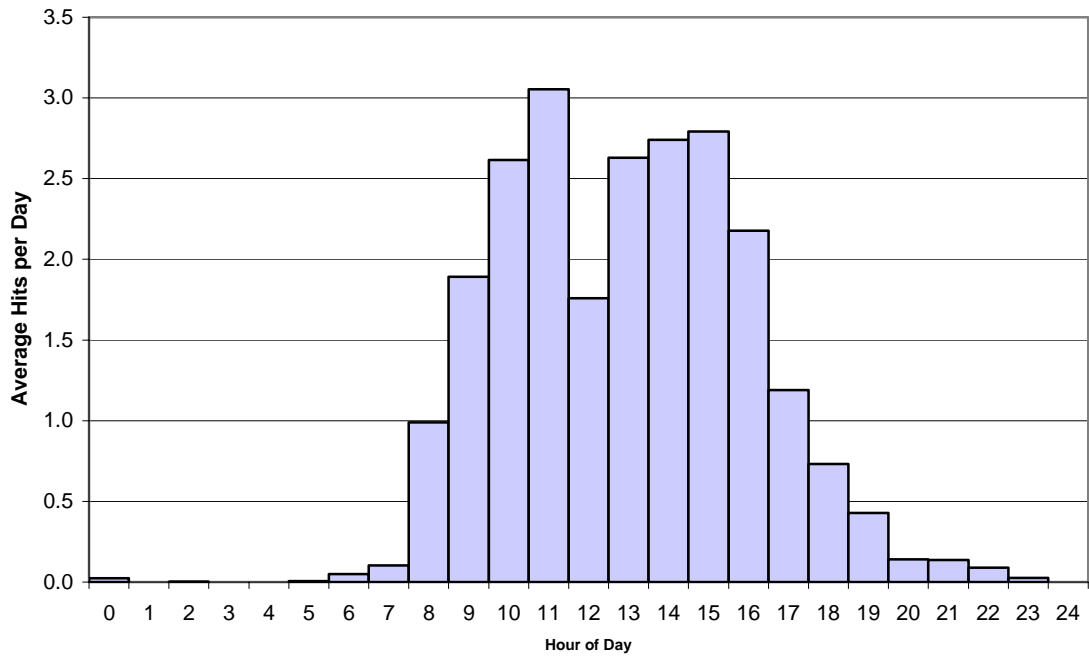

**Figure 3. KnowledgeLink Utilization as Function of Time of Day.**

### KL Usage by Day of Week

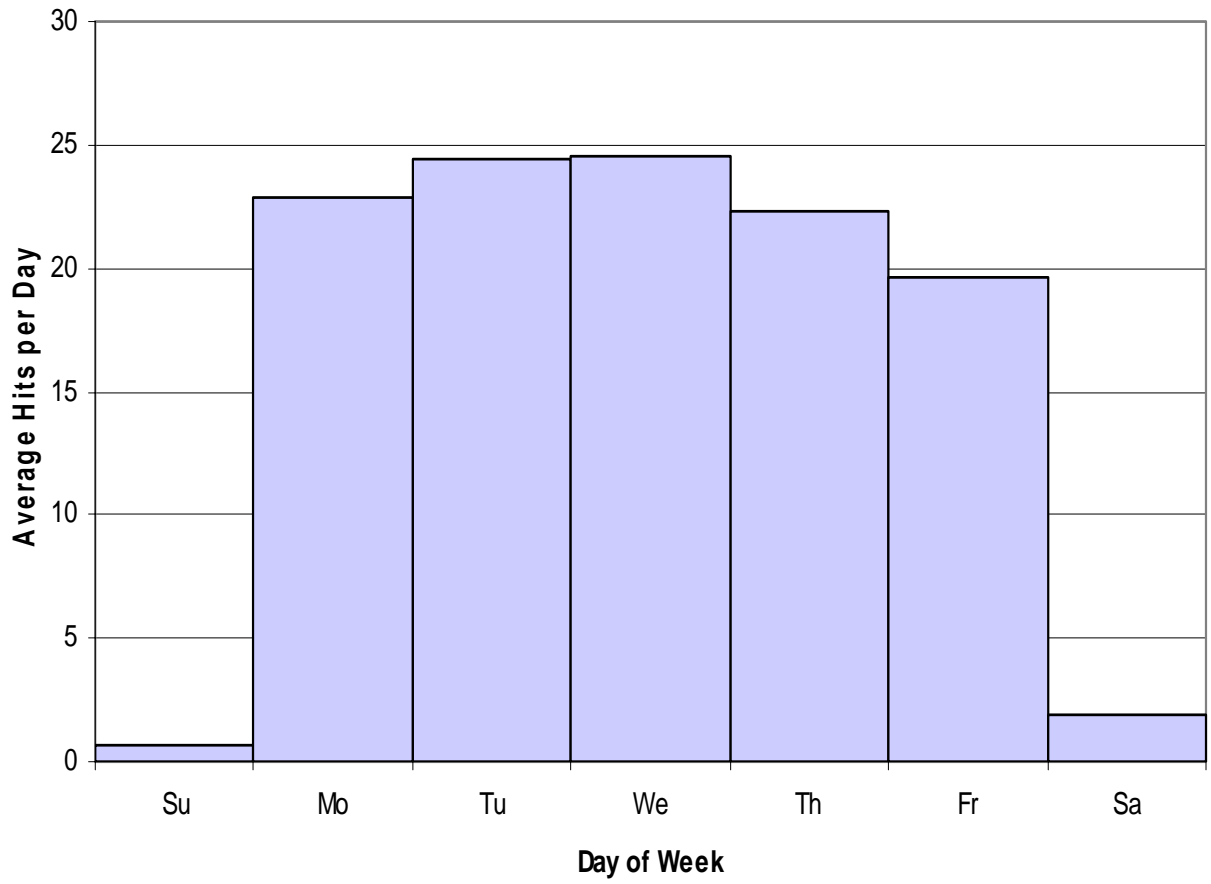

**Figure 4. KnowledgeLink Utilization as Function of Day of the Week.**
